# Supplementary material for: Surface chemistry imposes selective reduction of CO2 to CO over Ta3N5/LaTiO2N photocatalyst
Source: Royal Society of Chemistry journal article supplement (doi:10.1039/c8ta05339a), 2018-01-01
Supplement: c8ta05339a1.pdf [file c8ta05339a1.pdf]

## Supporting Information

### Surface Chemistry Imposing Selective Reduction of CO<sub>2</sub> to CO over Ta<sub>3</sub>N<sub>5</sub>/LaTiO<sub>2</sub>N Photocatalyst

Lei Lu,<sup>a, ‡</sup> Shaomang Wang,<sup>b, c, ‡</sup> Chenguang Zhou,<sup>a, ‡</sup> Zhan Shi,<sup>b</sup> Heng Zhu,<sup>a</sup> Zhenyu Xin,<sup>a</sup> Xiaohui Wang,<sup>a</sup> Shicheng Yan<sup>\*, a</sup>, and Zhigang Zou<sup>a, b</sup>

<sup>a</sup>Eco-materials and Renewable Energy Research Center (ERERC), National Laboratory of Solid State Microstructures, Collaborative Innovation Center of Advanced Microstructures, College of Engineering and Applied Sciences, Nanjing University, 210093, P. R. China

<sup>b</sup>Jiangsu Key Laboratory for Nano Technology, Department of Physics, Nanjing University, Nanjing 210093, P. R. China

<sup>c</sup>School of Environment and Safety Engineering, Changzhou University, Changzhou 213164 (P. R. China)

<sup>‡</sup>These authors contributed equally to this work.

Corresponding author E-mail: [yscfei@nju.edu.cn](mailto:yscfei@nju.edu.cn)

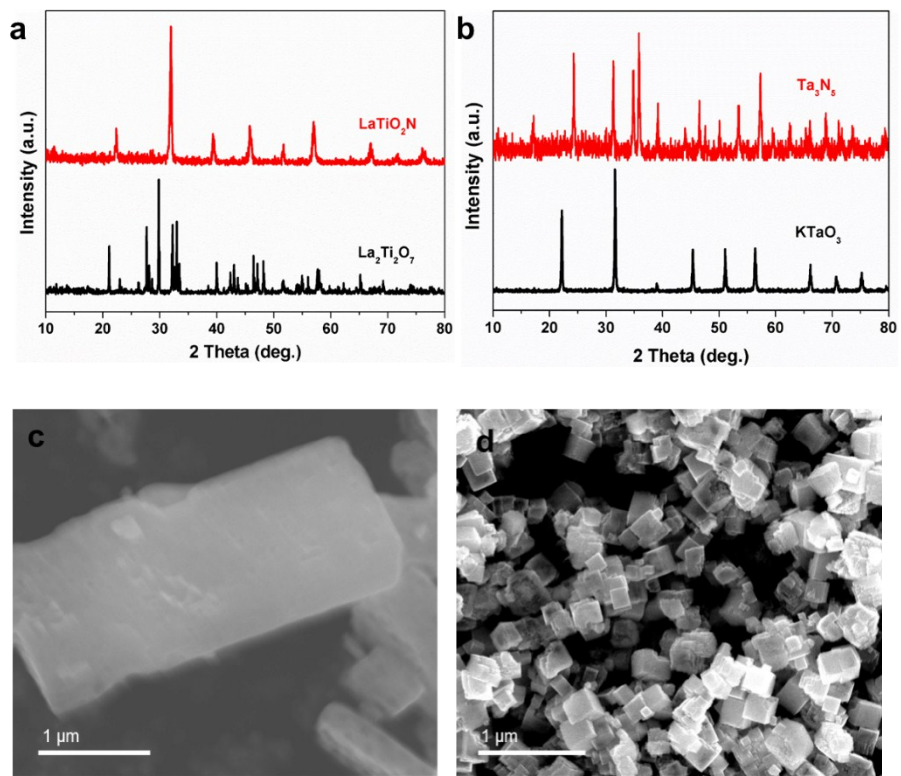

**Fig. S1.** XRD patterns for as-prepared (a)  $\text{La}_2\text{Ti}_2\text{O}_7$  and  $\text{LaTiO}_2\text{N}$ , and (b)  $\text{KTaO}_3$  and  $\text{Ta}_3\text{N}_5$ . SEM image of (c)  $\text{La}_2\text{Ti}_2\text{O}_7$  and (d)  $\text{KTaO}_3$ .

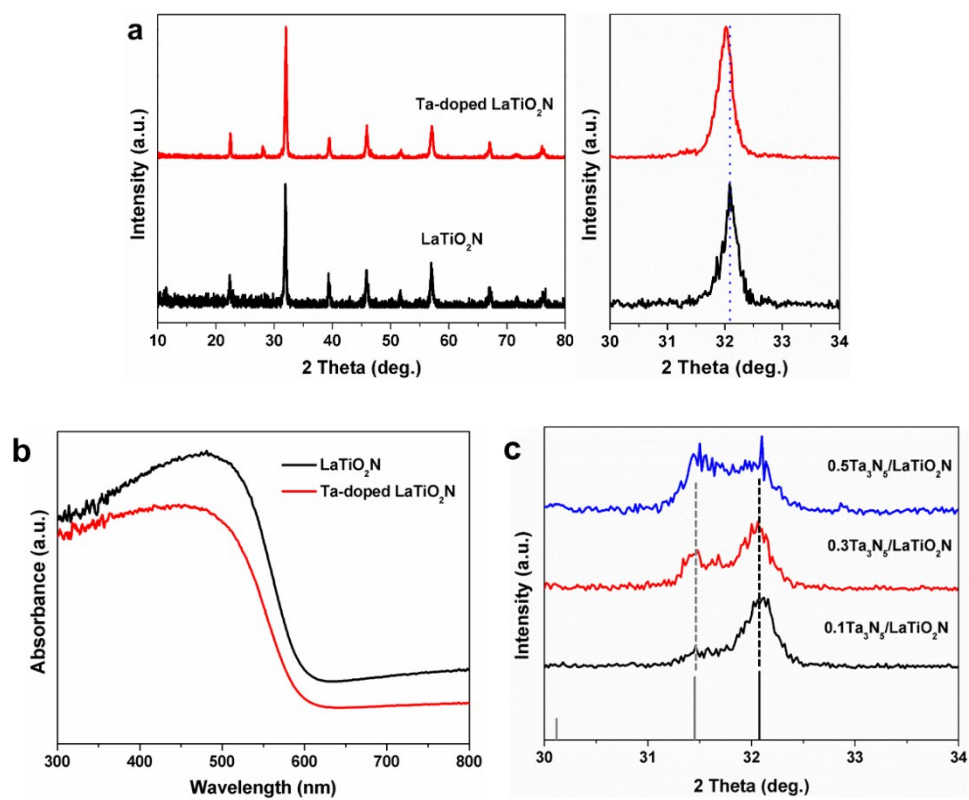

**Fig. S2.** (a) XRD patterns and (b) UV-vis absorption spectra for LaTiO<sub>2</sub>N and Ta-doped LaTiO<sub>2</sub>N. (c) Enlarged XRD patterns for  $x\text{Ta}_3\text{N}_5/\text{LaTiO}_2\text{N}$  ( $x = 0.1, 0.3, \text{ and } 0.5$ ).

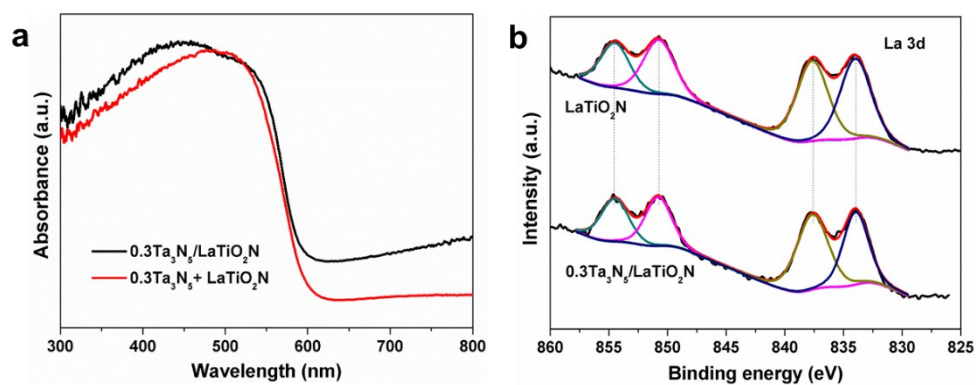

**Fig. S3.** (a) UV-vis absorption spectra for  $0.3\text{Ta}_3\text{N}_5/\text{LaTiO}_2\text{N}$  and mixtures of  $\text{Ta}_3\text{N}_5$  and  $\text{LaTiO}_2\text{N}$  with the same mole ratio. (b) La 3d XPS spectra for  $\text{LaTiO}_2\text{N}$  and  $0.3\text{Ta}_3\text{N}_5/\text{LaTiO}_2\text{N}$ .

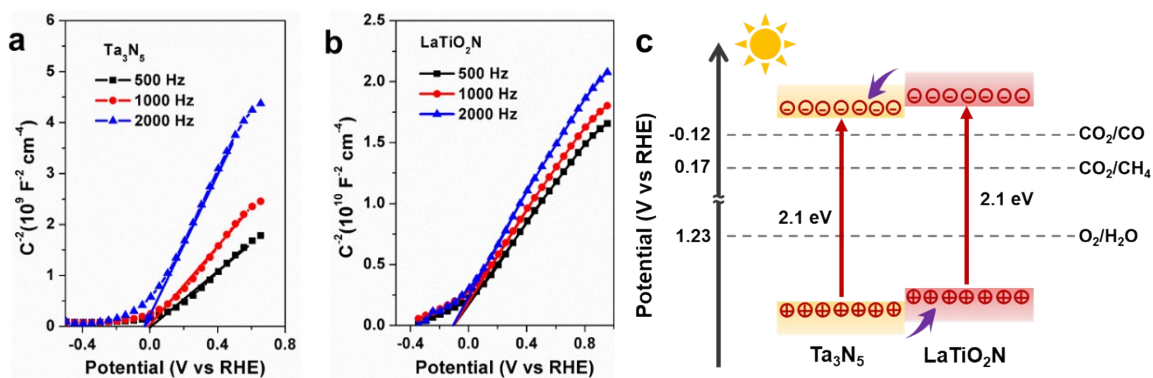

**Fig. S4.** Mott-Schottky plots for the (a)  $\text{Ta}_3\text{N}_5$  and (b)  $\text{LaTiO}_2\text{N}$ . Electrolyte: 0.5 M  $\text{Na}_2\text{SO}_4$  solution (pH 7). (c) The relative band positions for  $\text{Ta}_3\text{N}_5/\text{LaTiO}_2\text{N}$ .

The relative band positions of  $\text{Ta}_3\text{N}_5$  and  $\text{LaTiO}_2\text{N}$  were analyzed by combining their Mott-Schottky (M-S) plots and UV-vis results. As shown in **Fig. S4a**, the evaluated flat band potential of the as-prepared  $\text{Ta}_3\text{N}_5$  was about -0.018 V vs reversible hydrogen electrode (RHE), and the measured flat band potential of the  $\text{LaTiO}_2\text{N}$  was -0.132 V vs RHE (**Fig. 4b**). Normally, the CB bottom for an n-type semiconductor is about 0.2 V above the flat band potential.<sup>[1,2]</sup> Then, the corresponding CB positions of the n-type  $\text{Ta}_3\text{N}_5$  and  $\text{LaTiO}_2\text{N}$  were, respectively, estimated to be -0.218 and -0.332 eV. Based on their band gaps calculated from the UV-vis results (**Fig. 3a**), the relative VB positions of the  $\text{Ta}_3\text{N}_5$  and  $\text{LaTiO}_2\text{N}$  were deduced and given in **Fig. S4c**. Obviously, the composite materials showed a typical type- II heterojunction structure, in which the photogenerated electrons were expected to transfer from the CB of  $\text{LaTiO}_2\text{N}$  to  $\text{Ta}_3\text{N}_5$ , while the holes were followed by an opposite way. This indicated that the  $\text{CO}_2$  reduction would actually take place on  $\text{Ta}_3\text{N}_5$  surface. Here, it was noted that the measured CB and VB levels of  $\text{LaTiO}_2\text{N}$  were in consistent with the reported value,<sup>[3]</sup> while the corresponding CB and VB energies of  $\text{Ta}_3\text{N}_5$  were both lower than the previous reported value.<sup>[4]</sup> This was possibly resulted from the high content of  $\text{TaO}_x$  species (13.1%) in the as-prepared  $\text{Ta}_3\text{N}_5$  (**Fig. 3e**). Indeed, both the previous theoretical calculations and experimental results confirmed that the oxygen impurity contributed to the downshift of band position due to the lower energy of O 2p orbital than that of N 2p orbital, which composed the valence band of  $\text{Ta}_3\text{N}_5$ .<sup>[5,6]</sup>

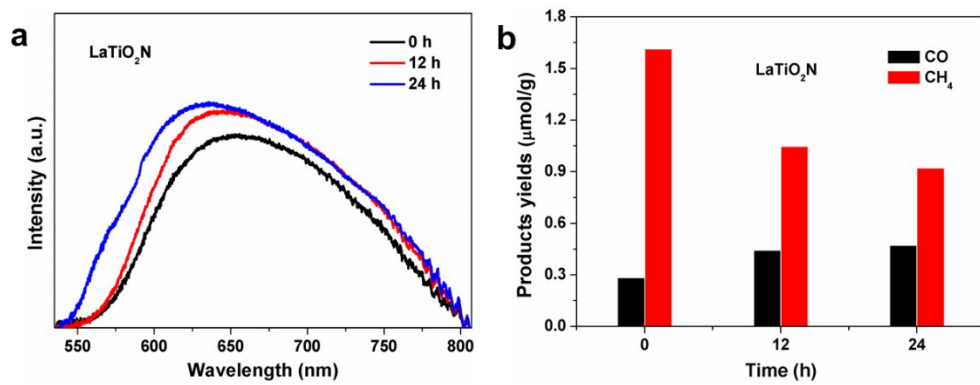

**Fig. S5.** (a) PL patterns and (b) according CO<sub>2</sub> reduction products for LaTiO<sub>2</sub>N with different annealing time under air.

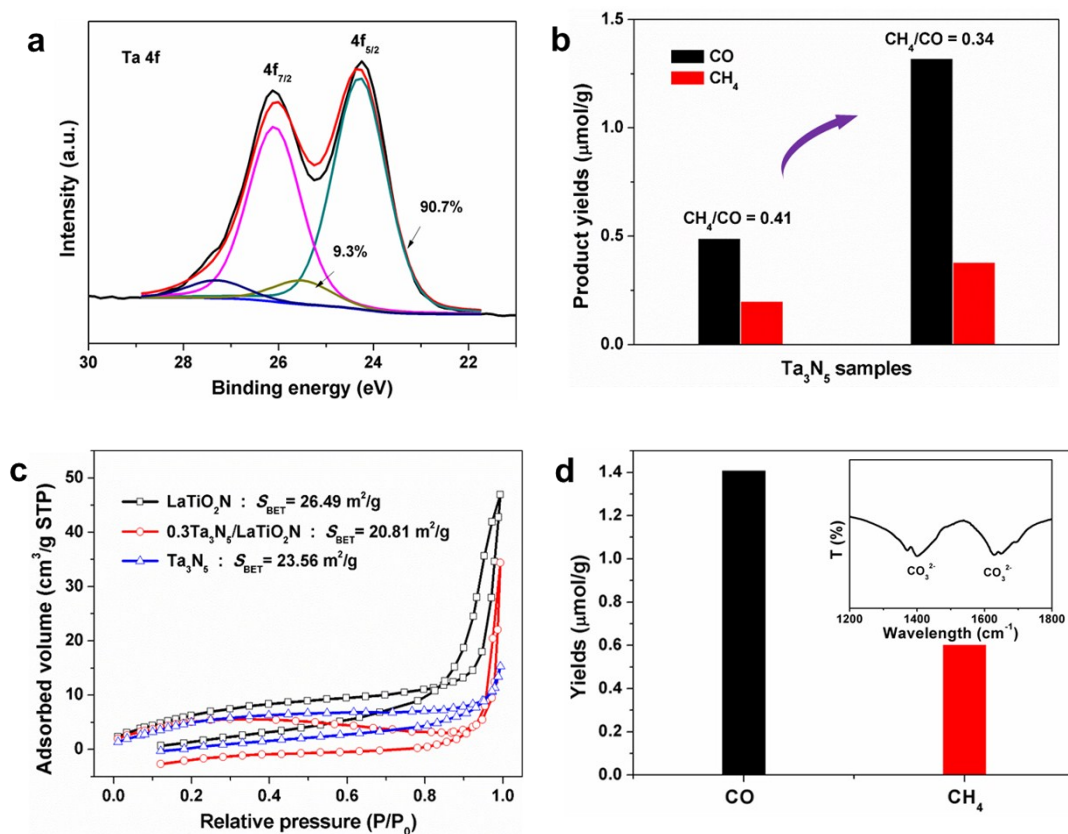

**Fig. S6.** (a) Ta 4f XPS peaks for Ta<sub>3</sub>N<sub>5</sub> by nitriding KTaO<sub>3</sub> at 1223 K for 8 h under 500 mL/min NH<sub>3</sub>. (b) CO<sub>2</sub> reduction products for Ta<sub>3</sub>N<sub>5</sub> samples from KTaO<sub>3</sub> with different nitridation process. (c) N<sub>2</sub> adsorption-desorption isotherms for LaTiO<sub>2</sub>N, Ta<sub>3</sub>N<sub>5</sub>, and 0.3Ta<sub>3</sub>N<sub>5</sub>/LaTiO<sub>2</sub>N samples. (d) The CO<sub>2</sub> reduction products over KOH modified (020) Ta<sub>3</sub>N<sub>5</sub> under the visible light irradiation for 8 h. The inset shows the FT-IR spectrum.

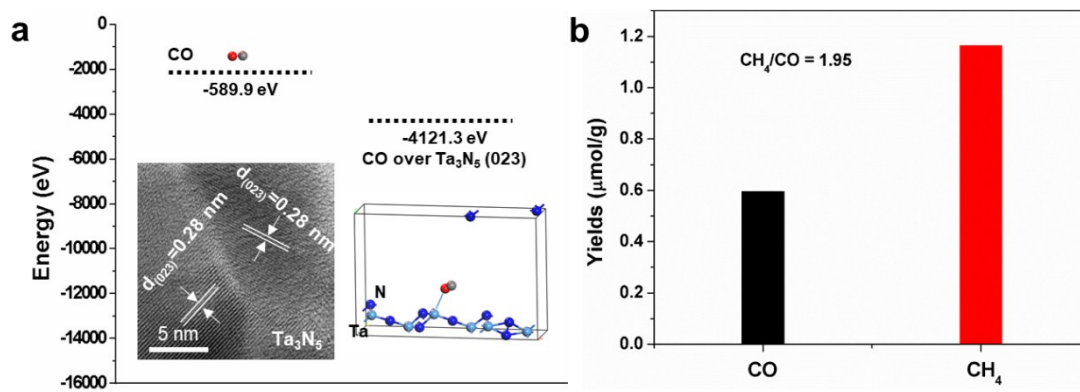

**Fig. S7.** (a) The adsorbed energy for CO on Ta<sub>3</sub>N<sub>5</sub> (023) facet. The calculated energy for Ta<sub>3</sub>N<sub>5</sub> (023) facet was -3528.7 eV. (b) CO<sub>2</sub> reduction products over polycrystalline Ta<sub>3</sub>N<sub>5</sub> prepared by direct nitriding of Ta<sub>2</sub>O<sub>5</sub> at 1123 K for 8 h under 500 mL/min NH<sub>3</sub>. The inset in Fig. S7a shows the TEM image of polycrystalline Ta<sub>3</sub>N<sub>5</sub>.



## REFERENCES

1. Y. Qi, S. Chen, M. Li, Q. Ding, Z. Li, J. Cui, B. Dong, F. Zhang and C. Li, *Chem. Sci.*, 2017, **8**, 437.
2. S. Chen, S. Shen, G. Liu, Y. Qi, F. Zhang and C. Li, *Angew. Chem. Int. Ed.*, 2015, **54**, 3047.
3. E. Watanabe, H. Ushiyama and K. Yamashita, *ACS Appl. Mater. Inter.*, 2017, **9**, 9559.
4. T. Minegishi, N. Nishimura, J. Kubota and K. Domen, *Chem. Sci.*, 2013, **4**, 1120.
5. Y. He, J. Thorne, C. Wu, P. Ma, C. Du, Q. Dong, J. Guoa and D. Wang, *Chem*, 2016, **1**, 640.
6. J. Wang, T. Fang, L. Zhang, J. Feng, Z. Li and Z. Zou, *J. Catal.*, 2014, **309**, 291.
